# Supplementary material for: Suppressed Helicobacter pylori-associated gastric tumorigenesis in Fat-1 transgenic mice producing endogenous ω-3 polyunsaturated fatty acids
Source: PubMed Central journal article supplement (PMC5341824; doi:10.18632/oncotarget.11261), 2016-08-12
Supplement: oncotarget-07-66606-s001.pdf [file oncotarget-07-66606-s001.pdf]

## Suppressed *Helicobacter pylori*-associated gastric tumorigenesis in Fat-1 transgenic mice producing endogenous $\omega$ -3 polyunsaturated fatty acids

### Supplementary Materials

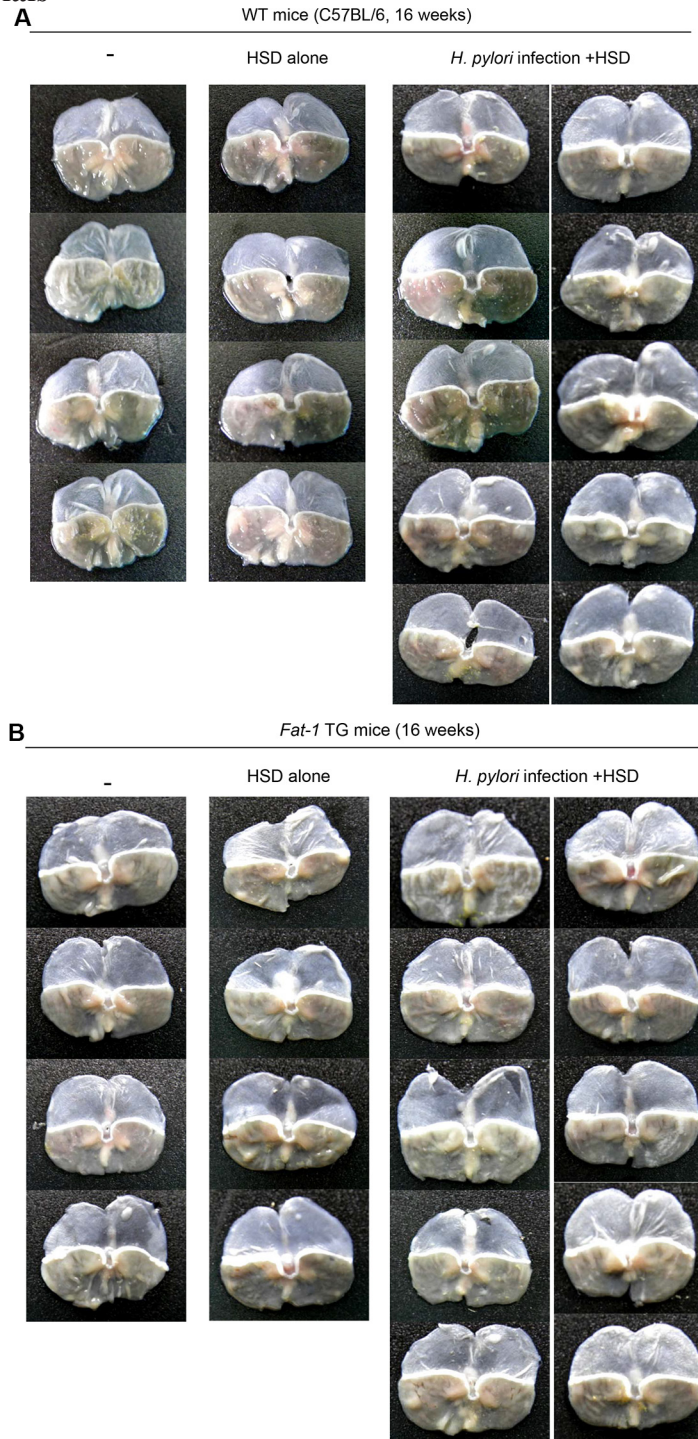

**Supplementary Figure S1: Gross photographs of mice stomach according to group observed at 16 weeks.** (A) Non-infected vehicle control group, HSD alone, and *H. pylori* infection of 16 weeks WT mice. (B) Non-infected vehicle control group, HSD alone, and *H. pylori* infection of 16 weeks *Fat-1* TG mice.

**A**

WT mice (C57BL/6, 24 weeks)

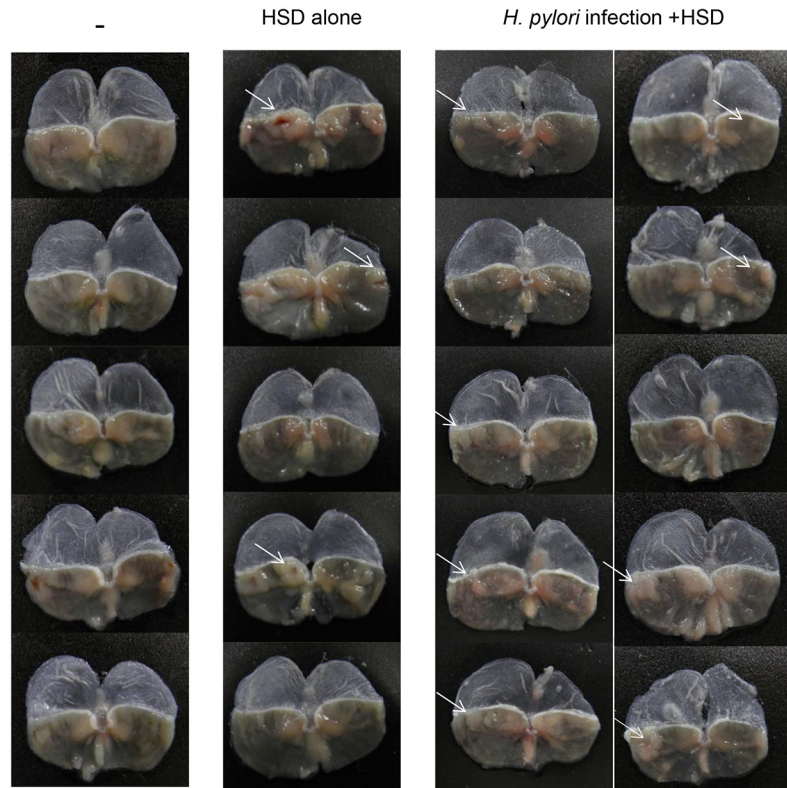**B***Fat-1* TG mice (24 weeks)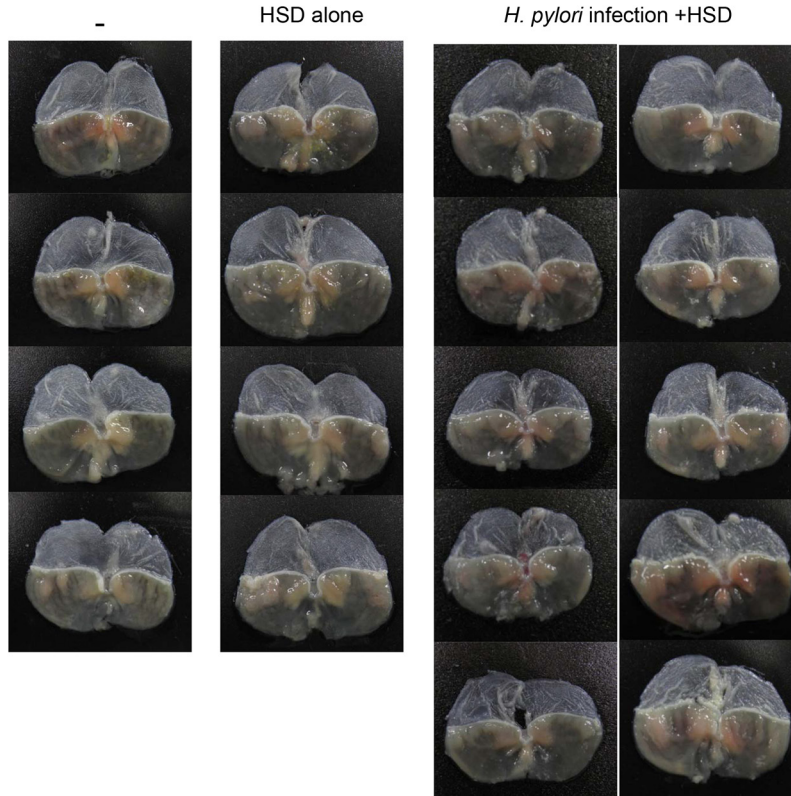

**Supplementary Figure S2: Gross photographs of mice stomach according to group observed at 24 weeks. (A)** Non-infected vehicle control group, HSD alone, and *H. pylori* infection of 24 weeks WT mice. **(B)** Non-infected vehicle control group, HSD alone, and *H. pylori* infection of 24 weeks *Fat-1* TG mice.

**A**

WT mice (C57BL/6, 32 weeks)

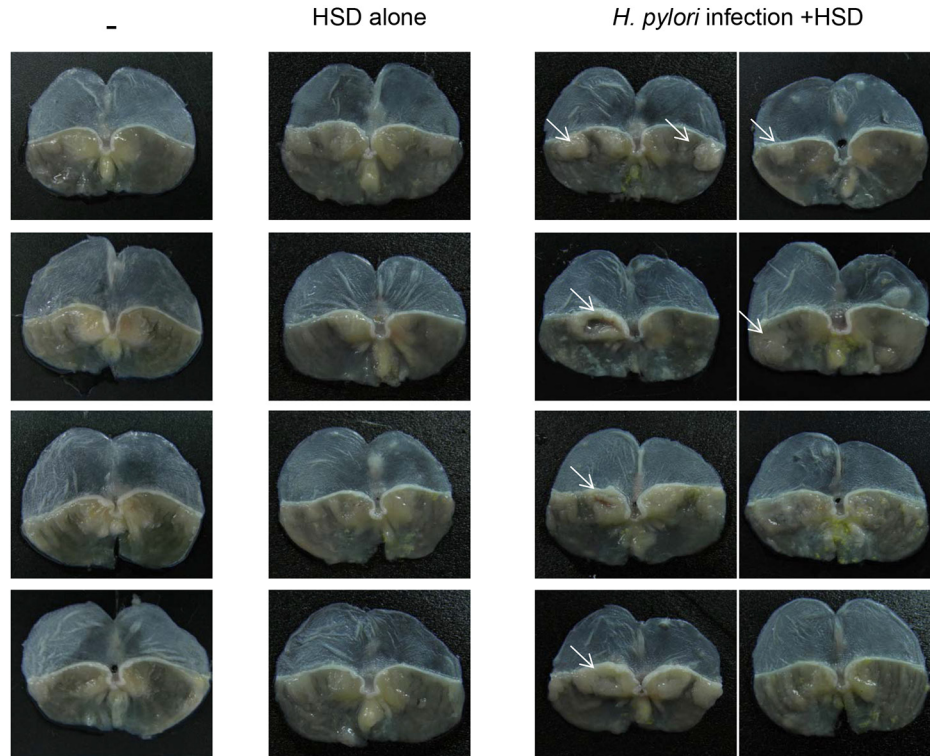**B***Fat-1* TG mice (32 weeks)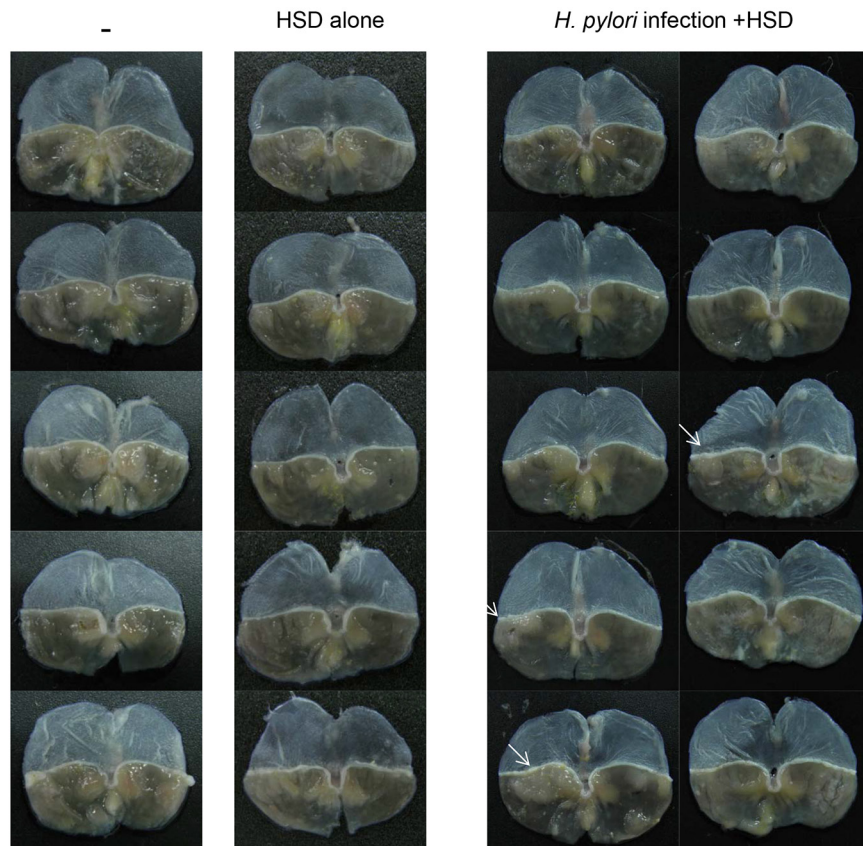

**Supplementary Figure S3: Gross photographs of whole mice stomach according to group observed at 32 weeks. (A) Non-infected vehicle control group, HSD alone, and *H. pylori* infection of 32 weeks WT mice. (B) Non-infected vehicle control group, HSD alone, and *H. pylori* infection of 32 weeks *Fat-1* TG mice.**

**A**

WT mice (C57BL/6, 45 weeks)

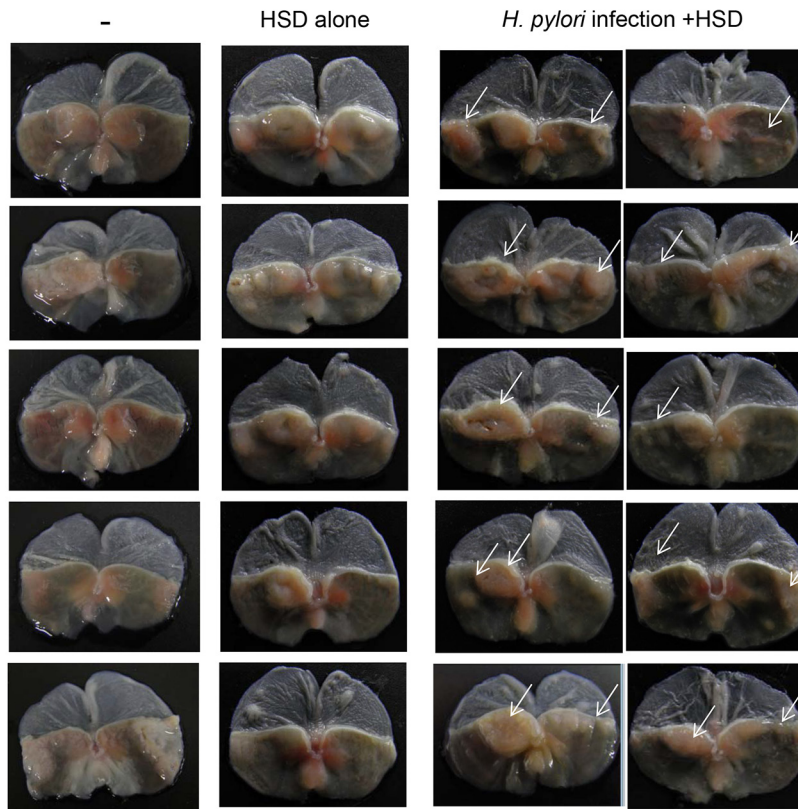**B***Fat-1* TG mice (45 weeks)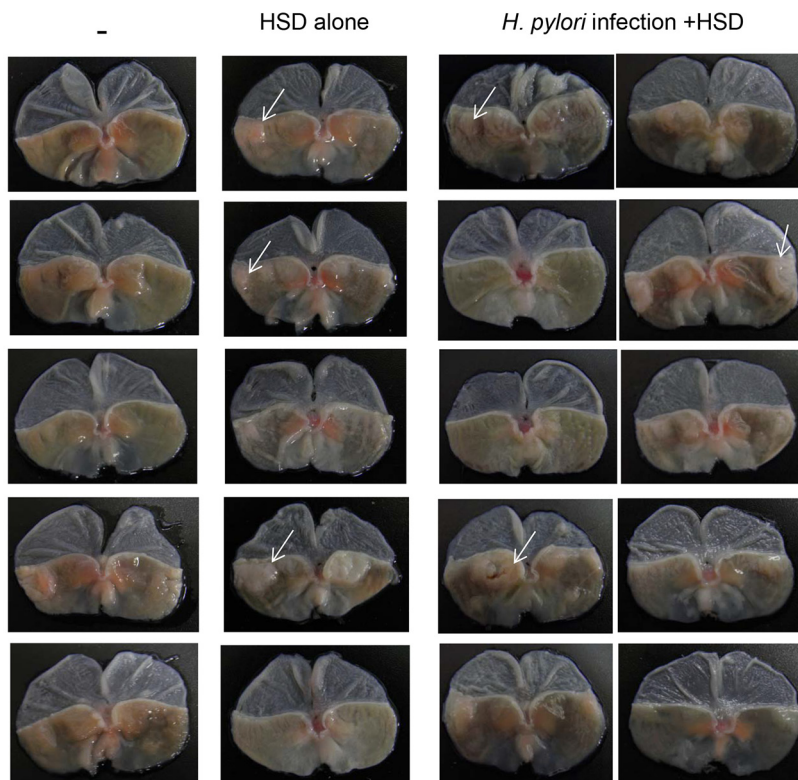

**Supplementary Figure S4: Gross photographs of whole mice stomach according to group observed at 45 weeks.** (A) Non-infected vehicle control group, HSD alone, and *H. pylori* infection of 45 weeks WT mice. (B) Non-infected vehicle control group, HSD alone, and *H. pylori* infection of 45 weeks *Fat-1* TG mice.
